# Supplementary material
Source: PubMed Central journal article supplement (PMC8675150)

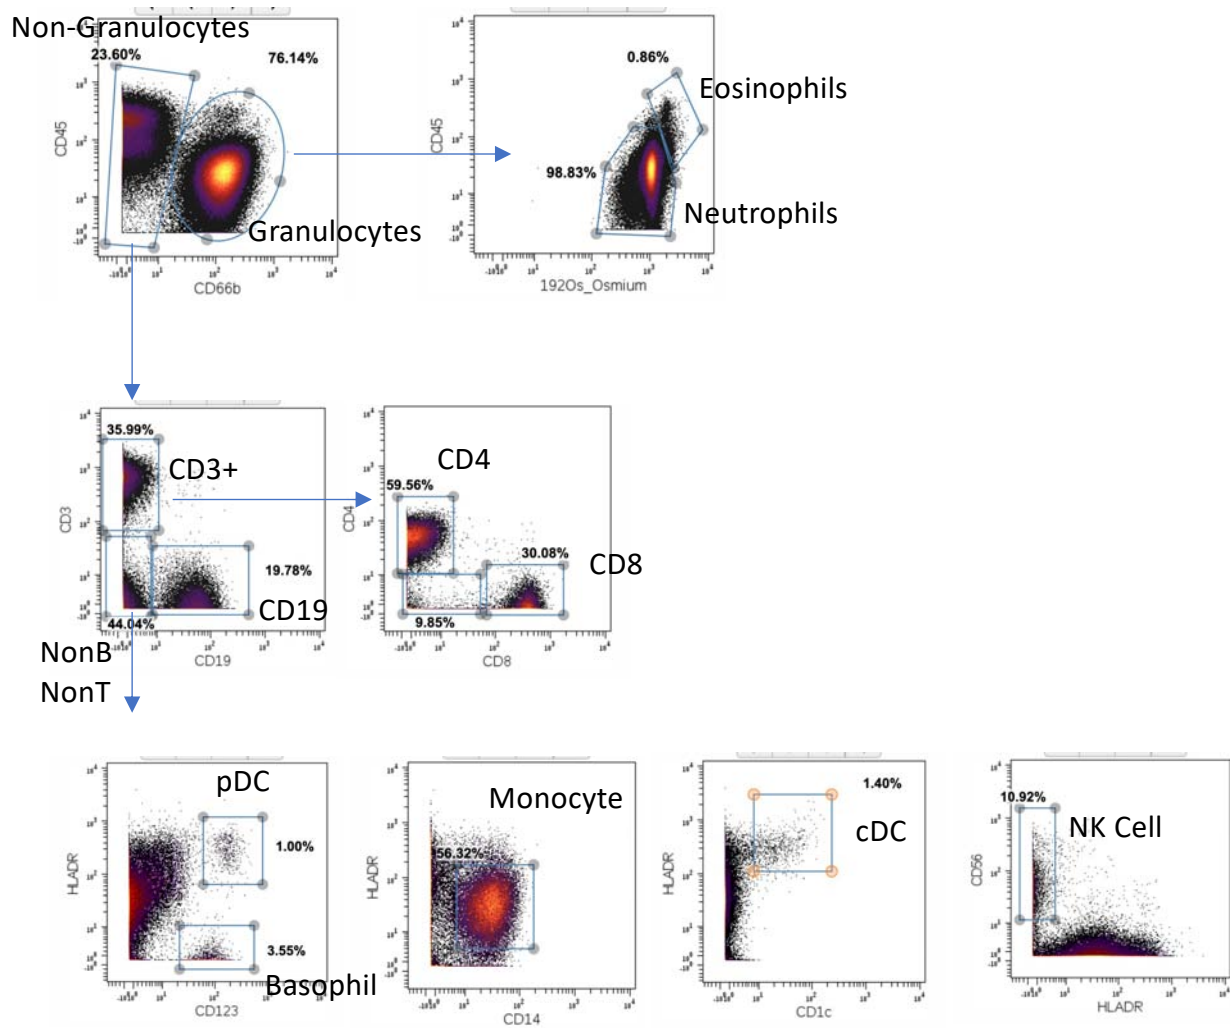

Figure E1

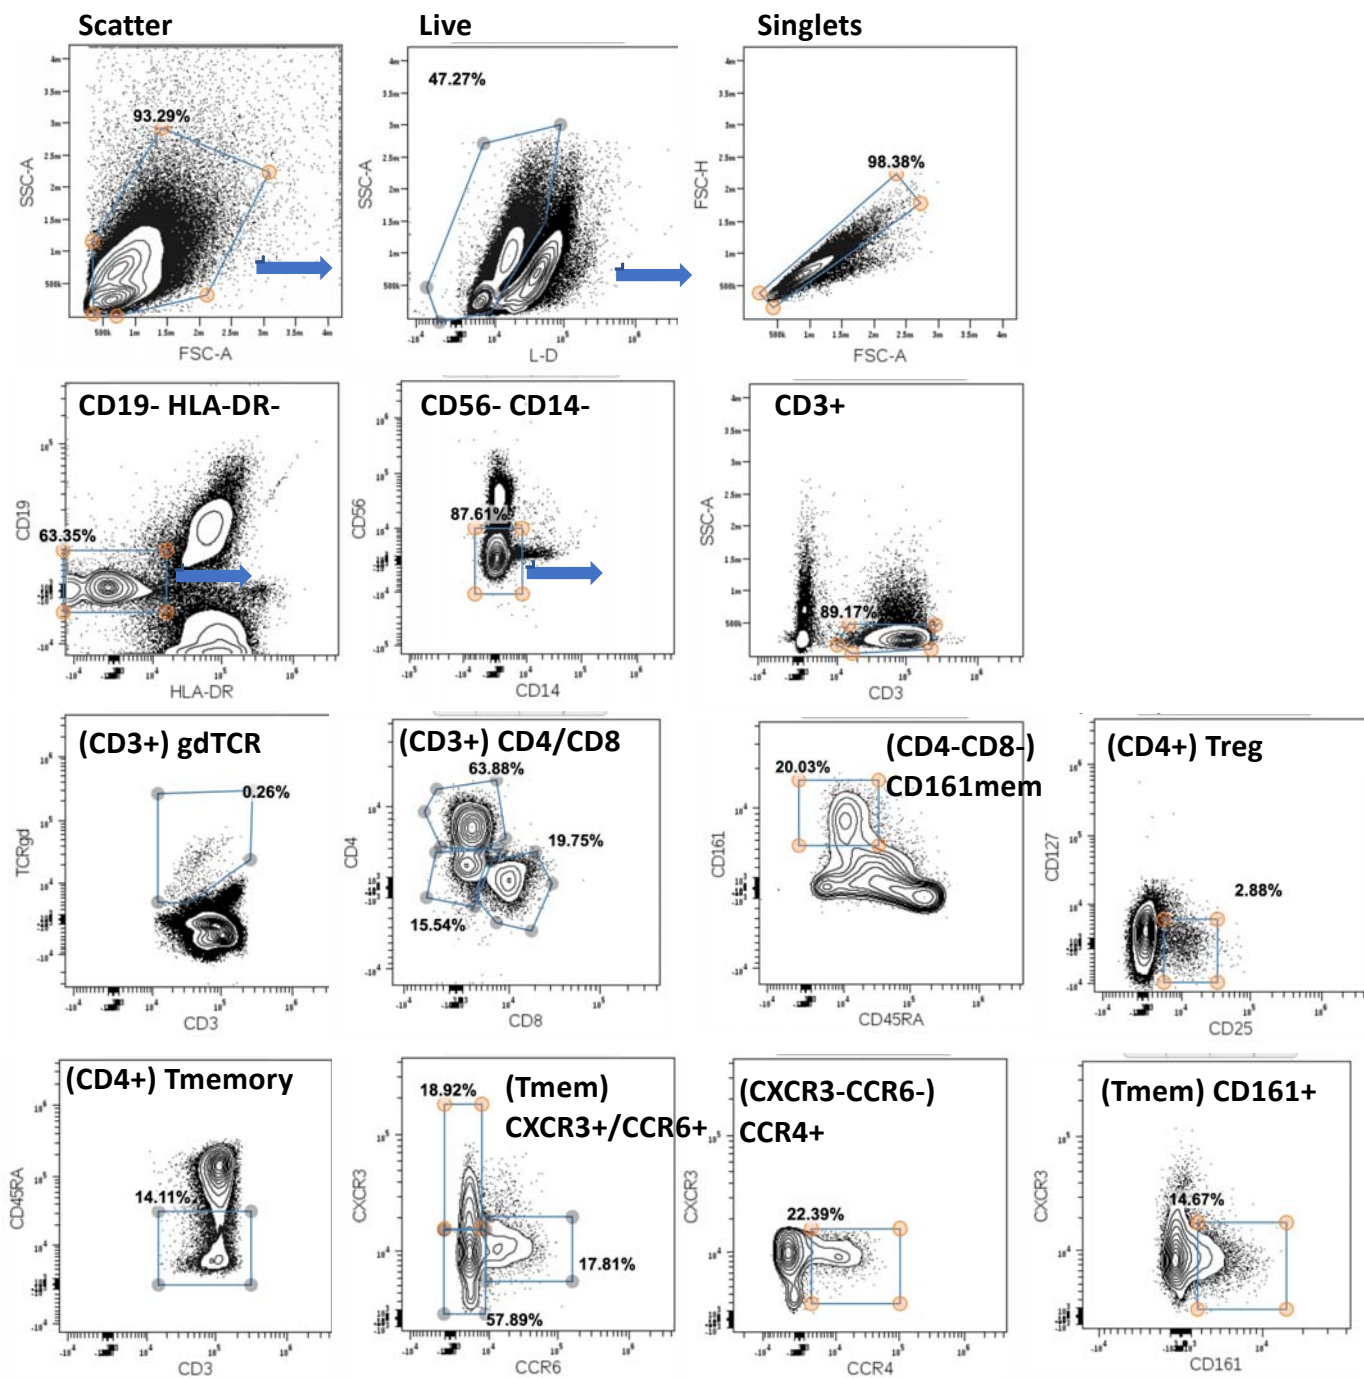

Figure E2

Supplement: NIHMS1695627-supplement-1.pdf [file NIHMS1695627-supplement-1.pdf]
